# Supplementary material for: Out-group animosity drives engagement on social media
Source: PubMed Central journal article supplement (PMC8256037; doi:10.1073/pnas.2024292118), 2021-06-23
Supplement: pnas.2024292118.sapp.pdf [file pnas.2024292118.sapp.pdf]

## Supplementary Information for

Outgroup animosity drives engagement on social media

Steve Rathje<sup>1</sup>, Jay J. Van Bavel<sup>2</sup>, Sander van der Linden<sup>1</sup>

<sup>1</sup>University of Cambridge, <sup>2</sup>New York University

\*Steve Rathje and Sander van der Linden

## Corresponding Author Emails:

sjr210@cam.ac.uk and sander.vanderlinden@psychol.cam.ac.uk

## This file includes:

**Table S1.** Full Regression Models for Study 1.

**Table S2.** VIFS for Study 1.

**Table S3.** Study 1 Regression Models Without Control Variables

**Table S4.** VIFS for Study 1 Regression Without Control Variables

**Table S5.** Study 1 Robustness Check (Cluster Robust Standard Errors)

**Table S6.** Liberal Media Reactions Regression Analysis

**Table S7.** Conservative Media Reactions Regression Analysis

**Table S8.** Study 1 Descriptive Statistics

**Table S9.** Liberal Media Facebook Reactions

**Table S10.** Conservative Media Correlations and Descriptive Statistics

**Table S11.** Study 2 Regression Models

**Table S12.** VIFS to Study 2

**Table S13.** Study 2 Models Without Control Variables

**Table S14.** VIFS for Study 2 Models Without Control Variables

**Table S15.** Study 2 With Cluster Robust Standard Errors

**Table S16.** Study 2 Relative Importance Analysis

**Table S17.** Study 2 Conservative Congress Facebook Reactions

**Table S18.** Study 2 Liberal Congress Facebook Reactions

**Table S19.** Liberal Congress Facebook Reactions

**Table S20.** Conservative Congress Facebook Reactions

**Table S21.** Descriptive Statistics – Congress

**Table S22.** Meta-Analyzed Effect Sizes (Facebook Reactions)

**Figure S1.** Pages Associated with the Most Engagement on Facebook and Twitter.

**Figure S2.** Histograms of the time the tweets and Facebook posts were created.

**Figure S3:** AllSides Media Bias Chart.

**Table S1.** Full Regression Models for Study 1.

|                    | Twitter                     |                             | Facebook                    |                             |
|--------------------|-----------------------------|-----------------------------|-----------------------------|-----------------------------|
|                    | Liberal                     | Conservative                | Liberal                     | Conservative                |
| (Intercept)        | 38.04 ***<br>[36.71, 39.42] | 68.68 ***<br>[66.25, 71.20] | 41.96 ***<br>[30.85, 57.08] | 19.75 ***<br>[17.74, 22.00] |
| Democrat           | 1.10 ***<br>[1.09, 1.12]    | 1.29 ***<br>[1.26, 1.31]    | 1.00<br>[0.99, 1.00]        | 1.35 ***<br>[1.34, 1.36]    |
| Republican         | 1.46 ***<br>[1.44, 1.48]    | 1.23 ***<br>[1.20, 1.26]    | 1.57 ***<br>[1.55, 1.58]    | 1.37 ***<br>[1.35, 1.38]    |
| NegativeAffect     | 1.08 ***<br>[1.07, 1.09]    | 1.08 ***<br>[1.06, 1.09]    | 1.05 ***<br>[1.05, 1.06]    | 0.98 ***<br>[0.98, 0.99]    |
| PositiveAffect     | 0.89 ***<br>[0.88, 0.90]    | 0.98 **<br>[0.97, 0.99]     | 0.90 ***<br>[0.89, 0.90]    | 0.94 ***<br>[0.93, 0.94]    |
| MoralEmotional     | 1.17 ***<br>[1.16, 1.19]    | 1.10 ***<br>[1.07, 1.13]    | 1.10 ***<br>[1.09, 1.11]    | 1.17 ***<br>[1.16, 1.19]    |
| has_mediaTRUE      | 1.47 ***<br>[1.44, 1.51]    | 0.54 ***<br>[0.53, 0.55]    | 2.83 ***<br>[2.08, 3.85]    | 5.18 ***<br>[4.64, 5.77]    |
| has_URLTRUE        | 0.73 ***<br>[0.70, 0.75]    | 0.38 ***<br>[0.37, 0.40]    | 1.80 ***<br>[1.32, 2.44]    | 5.04 ***<br>[4.53, 5.61]    |
| followers_count    | 1.00 ***<br>[1.00, 1.00]    | 1.00 ***<br>[1.00, 1.00]    |                             |                             |
| is_retweetTRUE     | 1.54 ***<br>[1.48, 1.60]    | 0.79 ***<br>[0.76, 0.82]    |                             |                             |
| `Likes at Posting` |                             |                             | 1.00 ***<br>[1.00, 1.00]    | 1.00 ***<br>[1.00, 1.00]    |
| N                  | 143702                      | 83527                       | 300000                      | 299999                      |
| AIC                | 489760.05                   | 294339.53                   | 1142251.76                  | 1206259.31                  |
| BIC                | 489868.68                   | 294442.19                   | 1142357.88                  | 1206365.43                  |
| Pseudo R2          | 0.19                        | 0.17                        | 0.15                        | 0.10                        |

\*\*\*  $p < 0.001$ ; \*\*  $p < 0.01$ ; \*  $p < 0.05$ .

**Table S2.** VIFS for Study 1.

|                  | Twitter      |         | Facebook     |         |
|------------------|--------------|---------|--------------|---------|
|                  | Conservative | Liberal | Conservative | Liberal |
|                  | VIF          | VIF     | VIF          | VIF     |
| Democrat         | 1.02         | 1.02    | 1.04         | 1.02    |
| Republican       | 1.01         | 1.01    | 1.03         | 1.02    |
| NegativeAffect   | 1.3          | 1.24    | 1.41         | 1.32    |
| PositiveAffect   | 1.11         | 1.07    | 1.07         | 1.06    |
| MoralEmotional   | 1.37         | 1.29    | 1.46         | 1.38    |
| has_media        | 1.09         | 1.11    | 55           | 370.06  |
| has_URL          | 1.6          | 2.74    | 55.52        | 370.08  |
| followers_count  | 1.02         | 1.01    |              |         |
| is_retweet       | 1.65         | 2.72    |              |         |
| Likes at Posting |              |         | 1.29         | 1.01    |

*Note.* Variance Inflation Factors (VIFS) for study 1. It should be noted that some VIFs are extremely high. This is because, in some cases, these variables are almost perfectly inversely correlated (e.g., if a Facebook post did not have a URL, it had media). These high VIFS were for control variables, not for key variables. We ran the model without control variables and the results were similar (Table S3) and the results were less problematic (Table S5).

**Table S3.** Study 1 Regression Models Without Control Variables

|                | Twitter                     |                          | Facebook                    |                              |
|----------------|-----------------------------|--------------------------|-----------------------------|------------------------------|
|                | Liberal                     | Conservative             | Liberal                     | Conservative                 |
| (Intercept)    | 13.50 ***<br>[13.44, 13.55] | 8.68 ***<br>[8.64, 8.72] | 80.90 ***<br>[80.40, 81.40] | 99.70 ***<br>[99.03, 100.37] |
| Democrat       | 1.04 ***<br>[1.04, 1.05]    | 3.27 ***<br>[3.23, 3.32] | 0.97 ***<br>[0.97, 0.98]    | 1.23 ***<br>[1.22, 1.24]     |
| Republican     | 2.41 ***<br>[2.38, 2.43]    | 1.26 ***<br>[1.25, 1.27] | 1.47 ***<br>[1.46, 1.48]    | 1.27 ***<br>[1.26, 1.29]     |
| NegativeAffect | 1.36 ***<br>[1.35, 1.37]    | 1.47 ***<br>[1.46, 1.48] | 1.04 ***<br>[1.03, 1.04]    | 0.98 ***<br>[0.98, 0.99]     |
| PositiveAffect | 0.91 ***<br>[0.91, 0.92]    | 1.00<br>[1.00, 1.01]     | 0.89 ***<br>[0.89, 0.90]    | 0.92 ***<br>[0.92, 0.93]     |
| MoralEmotional | 1.11 ***<br>[1.10, 1.12]    | 1.07 ***<br>[1.06, 1.08] | 1.12 ***<br>[1.10, 1.13]    | 1.18 ***<br>[1.17, 1.20]     |
| N              | 747675                      | 611292                   | 300000                      | 299999                       |
| AIC            | 3069655.63                  | 2530345.65               | 1179454.34                  | 1232001.33                   |
| BIC            | 3069736.30                  | 2530424.91               | 1179528.62                  | 1232075.61                   |
| Pseudo R2      | 0.08                        | 0.09                     | 0.03                        | 0.02                         |

\*\*\*  $p < 0.001$ ; \*\*  $p < 0.01$ ; \*  $p < 0.05$ .

**Table S4.** VIFS for Study 1 Regression Without Control Variables

|                | Twitter |              | Facebook |              |
|----------------|---------|--------------|----------|--------------|
|                | Liberal | Conservative | Liberal  | Conservative |
|                | VIF     | VIF          | VIF      | VIF          |
| Democrat       | 1.01    | 1.01         | 1.01     | 1.02         |
| Republican     | 1.01    | 1.01         | 1.01     | 1.02         |
| NegativeAffect | 1.24    | 1.29         | 1.32     | 1.41         |
| PositiveAffect | 1.06    | 1.08         | 1.06     | 1.07         |
| MoralEmotional | 1.29    | 1.37         | 1.38     | 1.46         |

**Table S5.** Study 1 Robustness Check (Cluster Robust Standard Errors)

|                    | Twitter                     |                             | Facebook                    |                             |
|--------------------|-----------------------------|-----------------------------|-----------------------------|-----------------------------|
|                    | Liberal                     | Conservative                | Liberal                     | Conservative                |
| (Intercept)        | 38.04 ***<br>[36.52, 39.62] | 68.68 ***<br>[65.73, 71.76] | 41.96 ***<br>[30.12, 58.46] | 19.75 ***<br>[17.51, 22.29] |
| Democrat           | 1.10 ***<br>[1.08, 1.12]    | 1.29 ***<br>[1.26, 1.32]    | 1.00<br>[0.99, 1.00]        | 1.35 ***<br>[1.34, 1.36]    |
| Republican         | 1.46 ***<br>[1.43, 1.48]    | 1.23 ***<br>[1.20, 1.26]    | 1.57 ***<br>[1.55, 1.58]    | 1.37 ***<br>[1.35, 1.38]    |
| NegativeAffect     | 1.08 ***<br>[1.07, 1.09]    | 1.08 ***<br>[1.06, 1.09]    | 1.05 ***<br>[1.05, 1.06]    | 0.98 ***<br>[0.98, 0.99]    |
| PositiveAffect     | 0.89 ***<br>[0.88, 0.90]    | 0.98 **<br>[0.97, 0.99]     | 0.90 ***<br>[0.89, 0.90]    | 0.94 ***<br>[0.93, 0.94]    |
| MoralEmotional     | 1.17 ***<br>[1.16, 1.19]    | 1.10 ***<br>[1.07, 1.13]    | 1.10 ***<br>[1.09, 1.11]    | 1.17 ***<br>[1.15, 1.20]    |
| has_mediaTRUE      | 1.47 ***<br>[1.44, 1.51]    | 0.54 ***<br>[0.53, 0.55]    | 2.83 ***<br>[2.03, 3.94]    | 5.18 ***<br>[4.58, 5.85]    |
| has_URLTRUE        | 0.73 ***<br>[0.70, 0.76]    | 0.38 ***<br>[0.37, 0.40]    | 1.80 ***<br>[1.29, 2.50]    | 5.04 ***<br>[4.47, 5.69]    |
| followers_count    | 1.00 ***<br>[1.00, 1.00]    | 1.00 ***<br>[1.00, 1.00]    |                             |                             |
| is_retweetTRUE     | 1.54 ***<br>[1.48, 1.61]    | 0.79 ***<br>[0.76, 0.82]    |                             |                             |
| `Likes at Posting` |                             |                             | 1.00 ***<br>[1.00, 1.00]    | 1.00 ***<br>[1.00, 1.00]    |
| N                  | 143702                      | 83527                       | 300000                      | 299999                      |
| AIC                | 489760.05                   | 294339.53                   | 1142251.76                  | 1206259.31                  |
| BIC                | 489868.68                   | 294442.19                   | 1142357.88                  | 1206365.43                  |
| Pseudo R2          | 0.19                        | 0.17                        | 0.15                        | 0.10                        |

\*\*\*  $p < 0.001$ ; \*\*  $p < 0.01$ ; \*  $p < 0.05$ .

**Table S5.** Study 1 Relative Importance Analysis

|                  | Twitter        |               | Facebook       |                 |
|------------------|----------------|---------------|----------------|-----------------|
|                  | Conservative   | Liberal       | Conservative   | Liberal         |
| Democrat         | <b>0.00734</b> | 0.0005        | <b>0.01082</b> | 0.000076        |
| Republican       | 0.00439        | <b>0.0095</b> | 0.01014        | <b>0.026482</b> |
| NegativeAffect   | 0.0023         | 0.0027        | 0.00032        | 0.001931        |
| PositiveAffect   | 0.00042        | 0.0032        | 0.00074        | 0.004462        |
| MoralEmotional   | 0.00149        | 0.0026        | 0.00204        | 0.001477        |
| has_media        | 0.02948        | 0.0073        | 0.00763        | 0.010908        |
| has_URL          | 0.03801        | 0.0204        |                |                 |
| followers_count  | 0.07837        | 0.1384        |                |                 |
| Likes at Posting |                |               | 0.06433        | 0.098183        |

Note. "Img" (or estimated R<sup>2</sup>) values are shown for each regression model

**Table S6. Liberal Media Reactions Regression Analysis**

|                    | Shares                      | Comments                      | Likes                          | Love                       | Wow                        | Haha                       | Sad                        | Angry                      | Retweet                     | Favorites                   |
|--------------------|-----------------------------|-------------------------------|--------------------------------|----------------------------|----------------------------|----------------------------|----------------------------|----------------------------|-----------------------------|-----------------------------|
| (Intercept)        | 41.96 ***<br>[30.85, 57.08] | 130.60 ***<br>[97.25, 175.37] | 191.46 ***<br>[146.85, 249.63] | 12.93 ***<br>[9.18, 18.21] | 12.59 ***<br>[9.32, 17.00] | 13.10 ***<br>[9.60, 17.87] | 12.40 ***<br>[8.43, 18.24] | 10.44 ***<br>[6.97, 15.64] | 38.04 ***<br>[36.71, 39.42] | 80.08 ***<br>[77.23, 83.02] |
| Democrat           | 1.00<br>[0.99, 1.00]        | 1.57 ***<br>[1.56, 1.58]      | 1.31 ***<br>[1.30, 1.32]       | 1.66 ***<br>[1.64, 1.68]   | 0.91 ***<br>[0.90, 0.92]   | 1.72 ***<br>[1.71, 1.74]   | 0.87 ***<br>[0.86, 0.88]   | 1.15 ***<br>[1.13, 1.16]   | 1.10 ***<br>[1.09, 1.12]    | 1.25 ***<br>[1.23, 1.27]    |
| Republican         | 1.57 ***<br>[1.55, 1.58]    | 2.23 ***<br>[2.21, 2.24]      | 1.45 ***<br>[1.44, 1.46]       | 1.44 ***<br>[1.42, 1.45]   | 1.54 ***<br>[1.52, 1.55]   | 2.92 ***<br>[2.90, 2.95]   | 1.35 ***<br>[1.33, 1.36]   | 3.33 ***<br>[3.30, 3.37]   | 1.46 ***<br>[1.44, 1.48]    | 1.22 ***<br>[1.20, 1.24]    |
| NegativeAffect     | 1.05 ***<br>[1.05, 1.06]    | 1.05 ***<br>[1.05, 1.06]      | 0.99 ***<br>[0.98, 0.99]       | 0.88 ***<br>[0.87, 0.88]   | 1.06 ***<br>[1.05, 1.06]   | 1.01 ***<br>[1.01, 1.02]   | 1.31 ***<br>[1.30, 1.32]   | 1.18 ***<br>[1.17, 1.18]   | 1.08 ***<br>[1.07, 1.09]    | 1.04 ***<br>[1.03, 1.05]    |
| PositiveAffect     | 0.90 ***<br>[0.89, 0.90]    | 0.86 ***<br>[0.86, 0.87]      | 0.98 ***<br>[0.98, 0.99]       | 1.12 ***<br>[1.11, 1.13]   | 0.79 ***<br>[0.79, 0.79]   | 0.92 ***<br>[0.92, 0.93]   | 0.77 ***<br>[0.76, 0.77]   | 0.78 ***<br>[0.77, 0.78]   | 0.89 ***<br>[0.88, 0.90]    | 0.95 ***<br>[0.95, 0.96]    |
| MoralEmotional     | 1.10 ***<br>[1.09, 1.11]    | 1.07 ***<br>[1.06, 1.08]      | 1.05 ***<br>[1.04, 1.05]       | 1.05 ***<br>[1.04, 1.06]   | 1.10 ***<br>[1.09, 1.11]   | 0.91 ***<br>[0.90, 0.92]   | 1.22 ***<br>[1.20, 1.23]   | 1.23 ***<br>[1.21, 1.25]   | 1.17 ***<br>[1.16, 1.19]    | 1.13 ***<br>[1.11, 1.15]    |
| has_URLTRUE        | 1.80 ***<br>[1.32, 2.44]    | 0.78<br>[0.58, 1.05]          | 1.00<br>[0.76, 1.30]           | 0.79<br>[0.56, 1.11]       | 1.09<br>[0.80, 1.47]       | 0.97<br>[0.71, 1.33]       | 1.04<br>[0.71, 1.53]       | 1.14<br>[0.76, 1.71]       | 0.73 ***<br>[0.70, 0.75]    | 0.80 ***<br>[0.77, 0.83]    |
| has_mediaTRUE      | 2.83 ***<br>[2.08, 3.85]    | 1.30<br>[0.97, 1.74]          | 1.68 ***<br>[1.29, 2.19]       | 2.33 ***<br>[1.66, 3.29]   | 1.30<br>[0.96, 1.76]       | 1.27<br>[0.93, 1.73]       | 1.16<br>[0.79, 1.70]       | 1.12<br>[0.75, 1.68]       | 1.47 ***<br>[1.44, 1.51]    | 1.66 ***<br>[1.62, 1.70]    |
| `Likes at Posting` | 1.00 ***<br>[1.00, 1.00]    | 1.00 ***<br>[1.00, 1.00]      | 1.00 ***<br>[1.00, 1.00]       | 1.00 ***<br>[1.00, 1.00]   | 1.00 ***<br>[1.00, 1.00]   | 1.00 ***<br>[1.00, 1.00]   | 1.00 ***<br>[1.00, 1.00]   | 1.00 ***<br>[1.00, 1.00]   |                             |                             |
| followers_count    |                             |                               |                                |                            |                            |                            |                            |                            | 1.00 ***<br>[1.00, 1.00]    | 1.00 ***<br>[1.00, 1.00]    |
| is_retweetTRUE     |                             |                               |                                |                            |                            |                            |                            |                            | 1.54 ***<br>[1.48, 1.60]    | 0.01 ***<br>[0.01, 0.01]    |
| N                  | 300000                      | 300000                        | 300000                         | 300000                     | 300000                     | 300000                     | 300000                     | 300000                     | 143702                      | 143702                      |
| AIC                | 1142251.76                  | 1116558.15                    | 1053241.80                     | 1206829.92                 | 1127482.48                 | 1148172.38                 | 1277786.18                 | 1305894.87                 | 489760.05                   | 494589.33                   |
| BIC                | 1142357.88                  | 1116664.26                    | 1053347.91                     | 1206936.04                 | 1127588.59                 | 1148278.49                 | 1277892.30                 | 1306000.98                 | 489868.68                   | 494697.97                   |
| Pseudo R2          | 0.15                        | 0.26                          | 0.22                           | 0.19                       | 0.17                       | 0.26                       | 0.11                       | 0.17                       | 0.19                        | 0.54                        |



**Table S7. Conservative Media Reactions Regression Analysis**

|                    | Shares                      | Comments                    | Likes                       | Love                       | Wow                      | Haha                     | Sad                      | Angry                    | Retweet                     | Favorites                   |
|--------------------|-----------------------------|-----------------------------|-----------------------------|----------------------------|--------------------------|--------------------------|--------------------------|--------------------------|-----------------------------|-----------------------------|
| (Intercept)        | 19.75 ***<br>[17.74, 22.00] | 28.89 ***<br>[26.09, 32.00] | 71.18 ***<br>[64.79, 78.19] | 11.15 ***<br>[9.94, 12.51] | 3.26 ***<br>[2.97, 3.59] | 3.98 ***<br>[3.53, 4.49] | 3.15 ***<br>[2.82, 3.52] | 3.17 ***<br>[2.76, 3.65] | 38.04 ***<br>[36.71, 39.42] | 80.08 ***<br>[77.23, 83.02] |
| Democrat           | 1.35 ***<br>[1.34, 1.36]    | 1.59 ***<br>[1.58, 1.60]    | 1.18 ***<br>[1.17, 1.19]    | 1.08 ***<br>[1.06, 1.09]   | 1.27 ***<br>[1.26, 1.28] | 2.47 ***<br>[2.45, 2.50] | 1.16 ***<br>[1.15, 1.17] | 1.83 ***<br>[1.81, 1.85] | 1.10 ***<br>[1.09, 1.12]    | 1.25 ***<br>[1.23, 1.27]    |
| Republican         | 1.37 ***<br>[1.35, 1.38]    | 1.81 ***<br>[1.80, 1.83]    | 1.77 ***<br>[1.76, 1.79]    | 2.26 ***<br>[2.24, 2.29]   | 0.99<br>[0.98, 1.00]     | 1.59 ***<br>[1.57, 1.61] | 0.96 ***<br>[0.95, 0.97] | 1.47 ***<br>[1.45, 1.49] | 1.46 ***<br>[1.44, 1.48]    | 1.22 ***<br>[1.20, 1.24]    |
| NegativeAffect     | 0.98 ***<br>[0.98, 0.99]    | 0.95 ***<br>[0.94, 0.95]    | 0.90 ***<br>[0.90, 0.91]    | 0.79 ***<br>[0.79, 0.80]   | 1.01 **<br>[1.00, 1.02]  | 0.93 ***<br>[0.92, 0.94] | 1.21 ***<br>[1.20, 1.22] | 1.09 ***<br>[1.08, 1.10] | 1.08 ***<br>[1.07, 1.09]    | 1.04 ***<br>[1.03, 1.05]    |
| PositiveAffect     | 0.94 ***<br>[0.93, 0.94]    | 0.89 ***<br>[0.88, 0.89]    | 1.05 ***<br>[1.04, 1.06]    | 1.21 ***<br>[1.20, 1.21]   | 0.83 ***<br>[0.82, 0.83] | 0.92 ***<br>[0.91, 0.92] | 0.82 ***<br>[0.81, 0.82] | 0.75 ***<br>[0.74, 0.75] | 0.89 ***<br>[0.88, 0.90]    | 0.95 ***<br>[0.95, 0.96]    |
| MoralEmotional     | 1.17 ***<br>[1.16, 1.19]    | 1.13 ***<br>[1.12, 1.14]    | 1.12 ***<br>[1.11, 1.13]    | 1.14 ***<br>[1.13, 1.15]   | 1.10 ***<br>[1.09, 1.11] | 0.91 ***<br>[0.89, 0.92] | 1.20 ***<br>[1.18, 1.21] | 1.27 ***<br>[1.25, 1.29] | 1.17 ***<br>[1.16, 1.19]    | 1.13 ***<br>[1.11, 1.15]    |
| has_URLTRUE        | 5.04 ***<br>[4.53, 5.61]    | 5.59 ***<br>[5.04, 6.19]    | 3.23 ***<br>[2.94, 3.55]    | 0.97<br>[0.86, 1.08]       | 6.02 ***<br>[5.47, 6.62] | 7.45 ***<br>[6.60, 8.41] | 3.48 ***<br>[3.12, 3.89] | 6.98 ***<br>[6.06, 8.03] | 0.73 ***<br>[0.70, 0.75]    | 0.80 ***<br>[0.77, 0.83]    |
| has_mediaTRUE      | 5.18 ***<br>[4.64, 5.77]    | 5.14 ***<br>[4.63, 5.70]    | 4.04 ***<br>[3.68, 4.45]    | 1.75 ***<br>[1.56, 1.97]   | 3.64 ***<br>[3.30, 4.00] | 6.75 ***<br>[5.98, 7.63] | 2.13 ***<br>[1.91, 2.38] | 4.20 ***<br>[3.64, 4.83] | 1.47 ***<br>[1.44, 1.51]    | 1.66 ***<br>[1.62, 1.70]    |
| `Likes at Posting` | 1.00 ***<br>[1.00, 1.00]    | 1.00 ***<br>[1.00, 1.00]    | 1.00 ***<br>[1.00, 1.00]    | 1.00 ***<br>[1.00, 1.00]   | 1.00 ***<br>[1.00, 1.00] | 1.00 ***<br>[1.00, 1.00] | 1.00 ***<br>[1.00, 1.00] | 1.00 ***<br>[1.00, 1.00] |                             |                             |
| followers_count    |                             |                             |                             |                            |                          |                          |                          |                          | 1.00 ***<br>[1.00, 1.00]    | 1.00 ***<br>[1.00, 1.00]    |
| is_retweetTRUE     |                             |                             |                             |                            |                          |                          |                          |                          | 1.54 ***<br>[1.48, 1.60]    | 0.01 ***<br>[0.01, 0.01]    |
| N                  | 299999                      | 299999                      | 299999                      | 299999                     | 299999                   | 299999                   | 299999                   | 299999                   | 143702                      | 143702                      |
| AIC                | 1206259.31                  | 1175256.73                  | 1125262.30                  | 1246255.47                 | 1132021.07               | 1275974.00               | 1219208.80               | 1365334.17               | 489760.05                   | 494589.33                   |
| BIC                | 1206365.43                  | 1175362.84                  | 1125368.41                  | 1246361.59                 | 1132127.18               | 1276080.12               | 1219314.91               | 1365440.28               | 489868.68                   | 494697.97                   |
| Pseudo R2          | 0.10                        | 0.18                        | 0.17                        | 0.18                       | 0.14                     | 0.15                     | 0.13                     | 0.08                     | 0.19                        | 0.54                        |

**Table S8.** Study 1 Descriptive Statistics

| Variable           | Conservative Twitter |           | Liberal Twitter |           | Conservative Facebook |           | Liberal Facebook |           |
|--------------------|----------------------|-----------|-----------------|-----------|-----------------------|-----------|------------------|-----------|
|                    | <i>M</i>             | <i>SD</i> | <i>M</i>        | <i>SD</i> | <i>M</i>              | <i>SD</i> | <i>M</i>         | <i>SD</i> |
| 1. Democrat        | 0.18                 | 0.50      | 0.13            | 0.45      | 0.20                  | 0.68      | 0.31             | 0.74      |
| 2. Republican      | 0.17                 | 0.44      | 0.15            | 0.42      | 0.27                  | 0.69      | 0.29             | 0.65      |
| 3. Positive Affect | 0.42                 | 0.73      | 0.55            | 0.82      | 0.81                  | 1.14      | 0.67             | 0.99      |
| 4. Negative Affect | 0.41                 | 0.70      | 0.52            | 0.79      | 0.82                  | 1.13      | 0.76             | 1.04      |
| 5. Moral Emotional | 0.18                 | 0.45      | 0.21            | 0.49      | 0.33                  | 0.70      | 0.31             | 0.67      |

*Note.* Means and standard deviations for each of the language categories in each dataset.

**Table S9.** Liberal Media Facebook Reactions

| Variable    | <i>M</i> | <i>SD</i> | 1                   | 2                   | 3                   | 4                   | 5                   | 6                   | 7                   |
|-------------|----------|-----------|---------------------|---------------------|---------------------|---------------------|---------------------|---------------------|---------------------|
| 1. Shares   | 491.17   | 3984.80   |                     |                     |                     |                     |                     |                     |                     |
| 2. Likes    | 864.71   | 4124.87   | .63**<br>[.62, .63] |                     |                     |                     |                     |                     |                     |
| 3. Comments | 410.85   | 1009.18   | .43**<br>[.43, .44] | .49**<br>[.48, .49] |                     |                     |                     |                     |                     |
| 4. Love     | 169.58   | 1290.41   | .32**<br>[.32, .32] | .79**<br>[.78, .79] | .32**<br>[.31, .32] |                     |                     |                     |                     |
| 5. Wow      | 82.22    | 686.84    | .51**<br>[.50, .51] | .45**<br>[.44, .45] | .33**<br>[.32, .33] | .17**<br>[.16, .17] |                     |                     |                     |
| 6. Haha     | 106.47   | 571.40    | .16**<br>[.16, .17] | .22**<br>[.21, .22] | .43**<br>[.43, .44] | .14**<br>[.13, .14] | .12**<br>[.12, .13] |                     |                     |
| 7. Sad      | 181.40   | 1343.43   | .42**<br>[.42, .42] | .28**<br>[.28, .29] | .26**<br>[.25, .26] | .10**<br>[.09, .10] | .23**<br>[.22, .23] | .02**<br>[.01, .02] |                     |
| 8. Angry    | 231.56   | 1123.14   | .22**<br>[.22, .23] | .07**<br>[.07, .08] | .46**<br>[.46, .47] | .00**<br>[.00, .01] | .18**<br>[.17, .18] | .14**<br>[.14, .15] | .13**<br>[.13, .14] |

*Note.* *M* and *SD* are used to represent mean and standard deviation, respectively. Values in square brackets indicate the 95% confidence interval for each correlation. \* indicates  $p < .05$ . \*\* indicates  $p < .01$ .

**Table S10.** Conservative Media Correlations and Descriptive Statistics

| Variable    | <i>M</i> | <i>SD</i> | 1                   | 2                   | 3                   | 4                   | 5                   | 6                   | 7                   |
|-------------|----------|-----------|---------------------|---------------------|---------------------|---------------------|---------------------|---------------------|---------------------|
| 1. Shares   | 755.51   | 4580.27   |                     |                     |                     |                     |                     |                     |                     |
| 2. Likes    | 1491.57  | 7194.08   | .55**<br>[.55, .55] |                     |                     |                     |                     |                     |                     |
| 3. Comments | 866.29   | 3159.10   | .34**<br>[.34, .34] | .38**<br>[.37, .38] |                     |                     |                     |                     |                     |
| 4. Love     | 264.84   | 2143.31   | .49**<br>[.49, .49] | .84**<br>[.84, .84] | .31**<br>[.31, .31] |                     |                     |                     |                     |
| 5. Wow      | 89.36    | 435.82    | .48**<br>[.48, .48] | .33**<br>[.32, .33] | .29**<br>[.28, .29] | .27**<br>[.27, .28] |                     |                     |                     |
| 6. Haha     | 367.68   | 2074.96   | .26**<br>[.26, .27] | .17**<br>[.17, .17] | .55**<br>[.55, .55] | .10**<br>[.10, .11] | .19**<br>[.19, .19] |                     |                     |
| 7. Sad      | 138.69   | 1447.45   | .26**<br>[.26, .27] | .09**<br>[.09, .10] | .13**<br>[.13, .13] | .06**<br>[.06, .07] | .18**<br>[.18, .18] | .01**<br>[.01, .02] |                     |
| 8. Angry    | 414.01   | 2054.33   | .21**<br>[.21, .22] | .05**<br>[.05, .06] | .60**<br>[.60, .61] | .01**<br>[.01, .01] | .29**<br>[.29, .30] | .29**<br>[.29, .30] | .14**<br>[.14, .15] |

*Note.* *M* and *SD* are used to represent mean and standard deviation, respectively. Values in square brackets indicate the 95% confidence interval for each correlation. \* indicates  $p < .05$ . \*\* indicates  $p < .01$

**Table S11.** Study 2 Regression Models

|                    | Facebook                 |                          | Twitter                  |                          |
|--------------------|--------------------------|--------------------------|--------------------------|--------------------------|
|                    | Liberal                  | Conservative             | Liberal                  | Conservative             |
| (Intercept)        | 8.79 ***<br>[8.65, 8.94] | 7.83 ***<br>[7.71, 7.95] | 9.70 ***<br>[9.63, 9.78] | 6.25 ***<br>[6.20, 6.30] |
| Democrat           | 1.02 ***<br>[1.01, 1.03] | 1.65 ***<br>[1.64, 1.67] | 0.75 ***<br>[0.75, 0.75] | 2.80 ***<br>[2.77, 2.84] |
| Republican         | 1.58 ***<br>[1.57, 1.59] | 1.20 ***<br>[1.19, 1.20] | 2.13 ***<br>[2.11, 2.15] | 0.85 ***<br>[0.84, 0.85] |
| NegativeAffect     | 1.14 ***<br>[1.13, 1.14] | 1.12 ***<br>[1.11, 1.12] | 1.33 ***<br>[1.33, 1.34] | 1.45 ***<br>[1.44, 1.45] |
| PositiveAffect     | 0.96 ***<br>[0.95, 0.96] | 0.98 ***<br>[0.97, 0.98] | 0.95 ***<br>[0.95, 0.95] | 1.04 ***<br>[1.04, 1.05] |
| MoralEmotional     | 1.06 ***<br>[1.05, 1.06] | 1.05 ***<br>[1.04, 1.05] | 1.10 ***<br>[1.10, 1.11] | 1.06 ***<br>[1.05, 1.07] |
| has_URLTRUE        | 1.24 ***<br>[1.21, 1.26] | 1.00<br>[0.98, 1.01]     | 0.95 ***<br>[0.94, 0.96] | 0.83 ***<br>[0.82, 0.83] |
| has_mediaTRUE      | 1.09 ***<br>[1.08, 1.11] | 0.92 ***<br>[0.91, 0.94] | 1.08 ***<br>[1.07, 1.09] | 1.22 ***<br>[1.20, 1.23] |
| `Likes at Posting` | 1.00 ***<br>[1.00, 1.00] | 1.00 ***<br>[1.00, 1.00] |                          |                          |
| followers_count    |                          |                          | 1.00 ***<br>[1.00, 1.00] | 1.00 ***<br>[1.00, 1.00] |
| is_retweetTRUE     |                          |                          | 5.10 ***<br>[5.04, 5.16] | 5.36 ***<br>[5.30, 5.42] |
| N                  | 354814                   | 410313                   | 747675                   | 611292                   |
| AIC                | 1253213.12               | 1474731.77               | 2861220.18               | 2343833.57               |
| BIC                | 1253320.92               | 1474841.02               | 2861346.95               | 2343958.13               |
| Pseudo R2          | 0.33                     | 0.13                     | 0.30                     | 0.33                     |

\*\*\*  $p < 0.001$ ; \*\*  $p < 0.01$ ; \*  $p < 0.05$ .

**Table S12.** VIFS to Study 2

|                  | Twitter      |         | Facebook     |         |
|------------------|--------------|---------|--------------|---------|
|                  | Conservative | Liberal | Conservative | Liberal |
|                  | VIF          | VIF     | VIF          | VIF     |
| Democrat         | 1.05         | 1.13    | 1.09         | 1.02    |
| Republican       | 1.14         | 1.03    | 1.08         | 1.1     |
| NegativeAffect   | 1.23         | 1.32    | 1.63         | 1.52    |
| PositiveAffect   | 1.24         | 1.22    | 1.41         | 1.36    |
| MoralEmotional   | 1.4          | 1.47    | 1.95         | 1.8     |
| has_media        | 1.33         | 1.33    | 3.27         | 3.67    |
| has_URL          | 1.38         | 1.37    | 3.32         | 3.71    |
| followers_count  | 1.01         | 1.01    |              |         |
| is_retweet       | 1.34         | 1.42    |              |         |
| Likes at Posting |              |         | 1            | 1.01    |

*Note.* Variance Inflation Factors (VIFS) for study 2.

**Table S13.** Study 2 Models Without Control Variables

|                | Twitter                     |                             | Facebook                    |                              |
|----------------|-----------------------------|-----------------------------|-----------------------------|------------------------------|
|                | Liberal                     | Conservative                | Liberal                     | Conservative                 |
| (Intercept)    | 31.36 ***<br>[31.13, 31.60] | 23.97 ***<br>[23.72, 24.22] | 80.90 ***<br>[80.40, 81.40] | 99.70 ***<br>[99.03, 100.37] |
| Democrat       | 1.03 **<br>[1.01, 1.05]     | 1.29 ***<br>[1.26, 1.32]    | 0.97 ***<br>[0.97, 0.98]    | 1.23 ***<br>[1.22, 1.24]     |
| Republican     | 1.35 ***<br>[1.32, 1.37]    | 1.26 ***<br>[1.23, 1.29]    | 1.47 ***<br>[1.46, 1.48]    | 1.27 ***<br>[1.26, 1.29]     |
| NegativeAffect | 1.08 ***<br>[1.06, 1.09]    | 1.10 ***<br>[1.08, 1.12]    | 1.04 ***<br>[1.03, 1.04]    | 0.98 ***<br>[0.98, 0.99]     |
| PositiveAffect | 0.89 ***<br>[0.89, 0.90]    | 1.04 ***<br>[1.02, 1.05]    | 0.89 ***<br>[0.89, 0.90]    | 0.92 ***<br>[0.92, 0.93]     |
| MoralEmotional | 1.17 ***<br>[1.15, 1.19]    | 1.11 ***<br>[1.08, 1.14]    | 1.12 ***<br>[1.10, 1.13]    | 1.18 ***<br>[1.17, 1.20]     |
| N              | 143702                      | 83527                       | 300000                      | 299999                       |
| AIC            | 517325.84                   | 307824.60                   | 1179454.34                  | 1232001.33                   |
| BIC            | 517394.97                   | 307889.93                   | 1179528.62                  | 1232075.61                   |
| Pseudo R2      | 0.02                        | 0.02                        | 0.03                        | 0.02                         |

\*\*\*  $p < 0.001$ ; \*\*  $p < 0.01$ ; \*  $p < 0.05$ .

**Table S14.** VIFS for Study 2 Models Without Control Variables

|                | Twitter |              | Facebook |              |
|----------------|---------|--------------|----------|--------------|
|                | Liberal | Conservative | Liberal  | Conservative |
|                | VIF     | VIF          | VIF      | VIF          |
| Democrat       | 1.01    | 1.04         | 1.02     | 1.09         |
| Republican     | 1.02    | 1.03         | 1.08     | 1.06         |
| NegativeAffect | 1.31    | 1.22         | 1.5      | 1.6          |
| PositiveAffect | 1.2     | 1.2          | 1.36     | 1.41         |
| MoralEmotional | 1.47    | 1.4          | 1.81     | 1.95         |



**Table S15.** Study 2 With Cluster Robust Standard Errors

|                    | Facebook                 |                          | Twitter                  |                          |
|--------------------|--------------------------|--------------------------|--------------------------|--------------------------|
|                    | Liberal                  | Conservative             | Liberal                  | Conservative             |
| (Intercept)        | 8.79 ***<br>[8.65, 8.94] | 7.83 ***<br>[7.70, 7.96] | 9.70 ***<br>[9.63, 9.78] | 6.25 ***<br>[6.20, 6.30] |
| Democrat           | 1.02 ***<br>[1.01, 1.03] | 1.65 ***<br>[1.62, 1.68] | 0.75 ***<br>[0.74, 0.76] | 2.80 ***<br>[2.75, 2.86] |
| Republican         | 1.58 ***<br>[1.56, 1.59] | 1.20 ***<br>[1.18, 1.21] | 2.13 ***<br>[2.10, 2.15] | 0.85 ***<br>[0.84, 0.86] |
| NegativeAffect     | 1.14 ***<br>[1.13, 1.14] | 1.12 ***<br>[1.11, 1.12] | 1.33 ***<br>[1.33, 1.34] | 1.45 ***<br>[1.43, 1.46] |
| PositiveAffect     | 0.96 ***<br>[0.95, 0.96] | 0.98 ***<br>[0.97, 0.98] | 0.95 ***<br>[0.95, 0.95] | 1.04 ***<br>[1.04, 1.05] |
| MoralEmotional     | 1.06 ***<br>[1.05, 1.06] | 1.05 ***<br>[1.04, 1.05] | 1.10 ***<br>[1.10, 1.11] | 1.06 ***<br>[1.05, 1.07] |
| has_mediaTRUE      | 1.09 ***<br>[1.07, 1.11] | 0.92 ***<br>[0.91, 0.94] | 1.08 ***<br>[1.07, 1.09] | 1.22 ***<br>[1.21, 1.23] |
| has_URLTRUE        | 1.24 ***<br>[1.21, 1.26] | 1.00<br>[0.98, 1.02]     | 0.95 ***<br>[0.94, 0.96] | 0.83 ***<br>[0.82, 0.83] |
| followers_count    |                          |                          | 1.00 ***<br>[1.00, 1.00] | 1.00 ***<br>[1.00, 1.00] |
| is_retweetTRUE     |                          |                          | 5.10 ***<br>[5.03, 5.18] | 5.36 ***<br>[5.28, 5.44] |
| `Likes at Posting` | 1.00 ***<br>[1.00, 1.00] | 1.00 ***<br>[1.00, 1.00] |                          |                          |
| N                  | 354814                   | 410313                   | 747675                   | 611292                   |
| AIC                | 1253213.12               | 1474731.77               | 2861220.18               | 2343833.57               |
| BIC                | 1253320.92               | 1474841.02               | 2861346.95               | 2343958.13               |
| Pseudo R2          | 0.33                     | 0.13                     | 0.30                     | 0.33                     |

\*\*\*  $p < 0.001$ ; \*\*  $p < 0.01$ ; \*  $p < 0.05$ .

**Table S16.** Study 2 Relative Importance Analysis

|                  | Twitter            |                    | Facebook           |                    |
|------------------|--------------------|--------------------|--------------------|--------------------|
|                  | Conservative       | Liberal            | Conservative       | Liberal            |
|                  | Img                | Img                | Img                | Img                |
| Democrat         | <b>0.046435128</b> | 0.003990291        | <b>0.037326404</b> | 0.000695989        |
| Republican       | 0.004320336        | <b>0.035396725</b> | 0.010754976        | <b>0.045910789</b> |
| NegativeAffect   | 0.020092764        | 0.021551454        | 0.018937441        | 0.022214026        |
| PositiveAffect   | 0.000413394        | 0.002722643        | 0.001024292        | 0.002541912        |
| MoralEmotional   | 0.003008898        | 0.004656238        | 0.005519233        | 0.006538567        |
| has_media        | 0.002206309        | 0.00426283         | 0.000992487        | 0.003629467        |
| has_URL          | 0.01654347         | 0.006841593        | 0.002193025        | 0.002415596        |
| followers_count  | 0.131899268        | 0.136219852        |                    |                    |
| is_retweet       | 0.10321281         | 0.08377927         |                    |                    |
| Likes at Posting |                    |                    | 0.048458365        | 0.244020805        |

**Table S17. Study 2 Conservative Congress Facebook Reactions**

|                    | Shares                   | Comments                    | Likes                       | Loves                    | Wow                      | Haha                     | Sad                      | Angry                    | Retweet                  | Favorite                    |
|--------------------|--------------------------|-----------------------------|-----------------------------|--------------------------|--------------------------|--------------------------|--------------------------|--------------------------|--------------------------|-----------------------------|
| (Intercept)        | 7.83 ***<br>[7.71, 7.95] | 31.95 ***<br>[31.38, 32.52] | 64.91 ***<br>[63.96, 65.87] | 4.56 ***<br>[4.50, 4.63] | 1.56 ***<br>[1.55, 1.57] | 2.36 ***<br>[2.33, 2.38] | 2.03 ***<br>[2.01, 2.04] | 3.08 ***<br>[3.04, 3.13] | 6.25 ***<br>[6.20, 6.30] | 12.08 ***<br>[11.99, 12.18] |
| Democrat           | 1.65 ***<br>[1.64, 1.67] | 1.58 ***<br>[1.56, 1.60]    | 1.32 ***<br>[1.31, 1.33]    | 1.13 ***<br>[1.12, 1.14] | 1.31 ***<br>[1.30, 1.31] | 1.43 ***<br>[1.42, 1.43] | 1.26 ***<br>[1.25, 1.27] | 1.68 ***<br>[1.67, 1.69] | 2.80 ***<br>[2.77, 2.84] | 1.93 ***<br>[1.91, 1.95]    |
| Republican         | 1.20 ***<br>[1.19, 1.20] | 1.41 ***<br>[1.40, 1.42]    | 1.26 ***<br>[1.25, 1.27]    | 1.32 ***<br>[1.31, 1.33] | 1.05 ***<br>[1.04, 1.05] | 1.28 ***<br>[1.27, 1.29] | 1.04 ***<br>[1.04, 1.04] | 1.25 ***<br>[1.24, 1.26] | 0.85 ***<br>[0.84, 0.85] | 1.18 ***<br>[1.17, 1.19]    |
| NegativeAffect     | 1.12 ***<br>[1.11, 1.12] | 1.10 ***<br>[1.09, 1.10]    | 1.05 ***<br>[1.05, 1.05]    | 1.00<br>[0.99, 1.00]     | 1.04 ***<br>[1.03, 1.04] | 1.00<br>[1.00, 1.00]     | 1.10 ***<br>[1.10, 1.10] | 1.06 ***<br>[1.06, 1.06] | 1.45 ***<br>[1.44, 1.45] | 1.37 ***<br>[1.36, 1.38]    |
| PositiveAffect     | 0.98 ***<br>[0.97, 0.98] | 0.99 ***<br>[0.99, 0.99]    | 1.01 ***<br>[1.01, 1.02]    | 1.02 ***<br>[1.02, 1.02] | 0.98 ***<br>[0.98, 0.98] | 0.98 ***<br>[0.98, 0.98] | 0.97 ***<br>[0.97, 0.97] | 0.96 ***<br>[0.96, 0.96] | 1.04 ***<br>[1.04, 1.05] | 1.16 ***<br>[1.16, 1.16]    |
| MoralEmotional     | 1.05 ***<br>[1.04, 1.05] | 1.03 ***<br>[1.03, 1.04]    | 1.02 ***<br>[1.02, 1.03]    | 1.05 ***<br>[1.04, 1.05] | 1.00<br>[1.00, 1.00]     | 1.00<br>[0.99, 1.00]     | 1.03 ***<br>[1.03, 1.04] | 1.02 ***<br>[1.02, 1.03] | 1.06 ***<br>[1.05, 1.07] | 1.03 ***<br>[1.03, 1.04]    |
| has_URLTRUE        | 1.00<br>[0.98, 1.01]     | 0.64 ***<br>[0.63, 0.65]    | 0.69 ***<br>[0.68, 0.70]    | 0.69 ***<br>[0.68, 0.71] | 0.99 **<br>[0.98, 1.00]  | 0.82 ***<br>[0.81, 0.83] | 0.77 ***<br>[0.77, 0.78] | 0.79 ***<br>[0.78, 0.81] | 0.83 ***<br>[0.82, 0.83] | 0.81 ***<br>[0.80, 0.82]    |
| has_mediaTRUE      | 0.92 ***<br>[0.91, 0.94] | 0.65 ***<br>[0.64, 0.67]    | 0.95 ***<br>[0.94, 0.97]    | 0.96 ***<br>[0.95, 0.98] | 0.92 ***<br>[0.91, 0.92] | 0.84 ***<br>[0.83, 0.84] | 0.73 ***<br>[0.73, 0.74] | 0.74 ***<br>[0.73, 0.75] | 1.22 ***<br>[1.20, 1.23] | 1.52 ***<br>[1.50, 1.53]    |
| `Likes at Posting` | 1.00 ***<br>[1.00, 1.00] | 1.00 ***<br>[1.00, 1.00]    | 1.00 ***<br>[1.00, 1.00]    | 1.00 ***<br>[1.00, 1.00] | 1.00 ***<br>[1.00, 1.00] | 1.00 ***<br>[1.00, 1.00] | 1.00 ***<br>[1.00, 1.00] | 1.00 ***<br>[1.00, 1.00] |                          |                             |
| is_retweetTRUE     |                          |                             |                             |                          |                          |                          |                          |                          | 5.36 ***<br>[5.30, 5.42] | 0.07 ***<br>[0.07, 0.07]    |
| followers_count    |                          |                             |                             |                          |                          |                          |                          |                          | 1.00 ***<br>[1.00, 1.00] | 1.00 ***<br>[1.00, 1.00]    |
| N                  | 410313                   | 410313                      | 410313                      | 410313                   | 410313                   | 410313                   | 410313                   | 410313                   | 611292                   | 611292                      |
| AIC                | 1474731.77               | 1608010.64                  | 1457229.58                  | 1422293.10               | 900551.43                | 1183686.06               | 1069002.13               | 1375557.79               | 2343833.57               | 2265816.97                  |
| BIC                | 1474841.02               | 1608119.89                  | 1457338.82                  | 1422402.35               | 900660.68                | 1183795.31               | 1069111.38               | 1375667.04               | 2343958.13               | 2265941.53                  |
| Pseudo R2          | 0.13                     | 0.11                        | 0.11                        | 0.09                     | 0.13                     | 0.13                     | 0.12                     | 0.13                     | 0.33                     | 0.43                        |

**Table S18. Study 2 Liberal Congress Facebook Reactions**

|                    | Shares       | Comments       | Likes          | Loves        | Wow          | Haha         | Sad          | Angry        | Retweet      | Favorite       |
|--------------------|--------------|----------------|----------------|--------------|--------------|--------------|--------------|--------------|--------------|----------------|
| (Intercept)        | 8.79 ***     | 26.67 ***      | 81.16 ***      | 7.74 ***     | 1.73 ***     | 2.76 ***     | 2.73 ***     | 2.87 ***     | 9.70 ***     | 25.87 ***      |
|                    | [8.65, 8.94] | [26.14, 27.21] | [79.87, 82.47] | [7.61, 7.88] | [1.71, 1.74] | [2.73, 2.80] | [2.69, 2.77] | [2.82, 2.91] | [9.63, 9.78] | [25.69, 26.05] |
| Democrat           | 1.02 ***     | 1.16 ***       | 1.12 ***       | 1.23 ***     | 0.97 ***     | 1.15 ***     | 0.89 ***     | 0.93 ***     | 0.75 ***     | 1.04 ***       |
|                    | [1.01, 1.03] | [1.15, 1.17]   | [1.11, 1.13]   | [1.22, 1.24] | [0.97, 0.98] | [1.14, 1.16] | [0.89, 0.90] | [0.92, 0.93] | [0.75, 0.75] | [1.04, 1.05]   |
| Republican         | 1.58 ***     | 1.75 ***       | 1.28 ***       | 1.01         | 1.32 ***     | 1.45 ***     | 1.42 ***     | 2.24 ***     | 2.13 ***     | 1.69 ***       |
|                    | [1.57, 1.59] | [1.74, 1.76]   | [1.27, 1.29]   | [1.00, 1.01] | [1.32, 1.33] | [1.44, 1.45] | [1.41, 1.42] | [2.22, 2.25] | [2.11, 2.15] | [1.68, 1.70]   |
| NegativeAffect     | 1.14 ***     | 1.17 ***       | 1.08 ***       | 1.01 ***     | 1.07 ***     | 1.04 ***     | 1.26 ***     | 1.17 ***     | 1.33 ***     | 1.30 ***       |
|                    | [1.13, 1.14] | [1.17, 1.18]   | [1.07, 1.08]   | [1.01, 1.01] | [1.07, 1.07] | [1.04, 1.04] | [1.25, 1.26] | [1.17, 1.17] | [1.33, 1.34] | [1.29, 1.30]   |
| PositiveAffect     | 0.96 ***     | 0.94 ***       | 1.02 ***       | 1.03 ***     | 0.96 ***     | 0.95 ***     | 0.92 ***     | 0.90 ***     | 0.95 ***     | 1.05 ***       |
|                    | [0.95, 0.96] | [0.94, 0.95]   | [1.02, 1.02]   | [1.03, 1.03] | [0.96, 0.97] | [0.95, 0.95] | [0.92, 0.92] | [0.90, 0.90] | [0.95, 0.95] | [1.05, 1.05]   |
| MoralEmotional     | 1.06 ***     | 1.09 ***       | 1.04 ***       | 1.05 ***     | 1.00         | 1.02 ***     | 1.05 ***     | 1.06 ***     | 1.10 ***     | 1.05 ***       |
|                    | [1.05, 1.06] | [1.08, 1.10]   | [1.03, 1.04]   | [1.04, 1.05] | [1.00, 1.00] | [1.02, 1.03] | [1.04, 1.05] | [1.06, 1.07] | [1.10, 1.11] | [1.05, 1.06]   |
| has_URLTRUE        | 1.24 ***     | 0.70 ***       | 0.66 ***       | 0.61 ***     | 1.24 ***     | 0.81 ***     | 1.04 ***     | 1.28 ***     | 0.95 ***     | 0.87 ***       |
|                    | [1.21, 1.26] | [0.68, 0.71]   | [0.65, 0.67]   | [0.60, 0.62] | [1.23, 1.26] | [0.80, 0.82] | [1.03, 1.06] | [1.26, 1.30] | [0.94, 0.96] | [0.86, 0.87]   |
| has_mediaTRUE      | 1.09 ***     | 0.66 ***       | 0.85 ***       | 0.94 ***     | 0.99         | 0.82 ***     | 0.74 ***     | 0.87 ***     | 1.08 ***     | 1.15 ***       |
|                    | [1.08, 1.11] | [0.65, 0.68]   | [0.84, 0.87]   | [0.92, 0.96] | [0.98, 1.00] | [0.81, 0.84] | [0.73, 0.75] | [0.85, 0.88] | [1.07, 1.09] | [1.14, 1.16]   |
| `Likes at Posting` | 1.00 ***     | 1.00 ***       | 1.00 ***       | 1.00 ***     | 1.00 ***     | 1.00 ***     | 1.00 ***     | 1.00 ***     |              |                |
|                    | [1.00, 1.00] | [1.00, 1.00]   | [1.00, 1.00]   | [1.00, 1.00] | [1.00, 1.00] | [1.00, 1.00] | [1.00, 1.00] | [1.00, 1.00] |              |                |
| is_retweetTRUE     |              |                |                |              |              |              |              |              | 5.10 ***     | 0.04 ***       |
|                    |              |                |                |              |              |              |              |              | [5.04, 5.16] | [0.04, 0.04]   |
| followers_count    |              |                |                |              |              |              |              |              | 1.00 ***     | 1.00 ***       |
|                    |              |                |                |              |              |              |              |              | [1.00, 1.00] | [1.00, 1.00]   |
| N                  | 354814       | 354814         | 354814         | 354814       | 354814       | 354814       | 354814       | 354814       | 747675       | 747675         |
| AIC                | 1253213.12   | 1391799.69     | 1228236.29     | 1266431.32   | 878864.12    | 1059362.91   | 1147845.85   | 1222456.91   | 2861220.18   | 2760433.97     |
| BIC                | 1253320.92   | 1391907.49     | 1228344.08     | 1266539.11   | 878971.92    | 1059470.70   | 1147953.64   | 1222564.70   | 2861346.95   | 2760560.74     |
| Pseudo R2          | 0.33         | 0.22           | 0.25           | 0.17         | 0.42         | 0.23         | 0.36         | 0.39         | 0.30         | 0.51           |

**Table S19.** Liberal Congress Facebook Reactions

| Variable    | <i>M</i> | <i>SD</i> | 1                   | 2                   | 3                   | 4                   | 5                   | 6                   | 7                   |
|-------------|----------|-----------|---------------------|---------------------|---------------------|---------------------|---------------------|---------------------|---------------------|
| 1. Shares   | 134.14   | 1590.63   |                     |                     |                     |                     |                     |                     |                     |
| 2. Likes    | 333.68   | 1722.16   | .60**<br>[.59, .60] |                     |                     |                     |                     |                     |                     |
| 3. Comments | 124.52   | 506.20    | .45**<br>[.44, .45] | .57**<br>[.57, .58] |                     |                     |                     |                     |                     |
| 4. Love     | 41.35    | 325.31    | .43**<br>[.43, .43] | .80**<br>[.80, .81] | .48**<br>[.48, .49] |                     |                     |                     |                     |
| 5. Wow      | 7.59     | 80.29     | .52**<br>[.52, .52] | .41**<br>[.41, .42] | .38**<br>[.38, .38] | .15**<br>[.15, .16] |                     |                     |                     |
| 6. Haha     | 8.46     | 88.31     | .24**<br>[.24, .24] | .30**<br>[.30, .31] | .40**<br>[.40, .40] | .21**<br>[.21, .21] | .24**<br>[.24, .25] |                     |                     |
| 7. Sad      | 28.75    | 272.60    | .38**<br>[.38, .38] | .35**<br>[.35, .36] | .34**<br>[.34, .34] | .12**<br>[.12, .13] | .40**<br>[.40, .40] | .09**<br>[.09, .10] |                     |
| 8. Angry    | 67.91    | 672.91    | .41**<br>[.41, .42] | .31**<br>[.30, .31] | .43**<br>[.43, .43] | .04**<br>[.04, .05] | .63**<br>[.63, .63] | .20**<br>[.20, .20] | .45**<br>[.45, .45] |

*Note.* *M* and *SD* are used to represent mean and standard deviation, respectively. Values in square brackets indicate the 95% confidence interval for each correlation. \* indicates  $p < .05$ . \*\* indicates  $p < .01$ .

**Table S20.** Conservative Congress Facebook Reactions

| Variable    | <i>M</i> | <i>SD</i> | 1                   | 2                   | 3                   | 4                   | 5                   | 6                   | 7                   |
|-------------|----------|-----------|---------------------|---------------------|---------------------|---------------------|---------------------|---------------------|---------------------|
| 1. Shares   | 67.82    | 5292.50   |                     |                     |                     |                     |                     |                     |                     |
| 2. Likes    | 241.78   | 1659.19   | .67**<br>[.66, .67] |                     |                     |                     |                     |                     |                     |
| 3. Comments | 97.68    | 512.71    | .41**<br>[.41, .42] | .54**<br>[.54, .54] |                     |                     |                     |                     |                     |
| 4. Love     | 17.66    | 153.78    | .12**<br>[.11, .12] | .44**<br>[.44, .45] | .35**<br>[.35, .35] |                     |                     |                     |                     |
| 5. Wow      | 2.09     | 35.43     | .73**<br>[.73, .73] | .55**<br>[.55, .55] | .46**<br>[.46, .46] | .17**<br>[.17, .17] |                     |                     |                     |
| 6. Haha     | 4.69     | 45.48     | .06**<br>[.06, .06] | .18**<br>[.18, .18] | .34**<br>[.34, .34] | .23**<br>[.23, .23] | .19**<br>[.19, .19] |                     |                     |
| 7. Sad      | 5.07     | 109.59    | .07**<br>[.06, .07] | .12**<br>[.12, .12] | .21**<br>[.21, .21] | .09**<br>[.09, .10] | .29**<br>[.29, .29] | .04**<br>[.04, .04] |                     |
| 8. Angry    | 15.60    | 212.02    | .47**<br>[.47, .47] | .38**<br>[.38, .39] | .64**<br>[.64, .64] | .13**<br>[.13, .13] | .67**<br>[.67, .67] | .22**<br>[.22, .23] | .22**<br>[.21, .22] |

*Note.* *M* and *SD* are used to represent mean and standard deviation, respectively. Values in square brackets indicate the 95% confidence interval for each correlation. \* indicates  $p < .05$ . \*\* indicates  $p < .01$ .

**Table S21.** Descriptive Statistics – Congress

| Variable          | Conservative Twitter |           | Liberal Twitter |           | Conservative Congress |           | Liberal Congress |           |
|-------------------|----------------------|-----------|-----------------|-----------|-----------------------|-----------|------------------|-----------|
|                   | <i>M</i>             | <i>SD</i> | <i>M</i>        | <i>SD</i> | <i>M</i>              | <i>SD</i> | <i>M</i>         | <i>SD</i> |
| 1. Democrat       | 0.1                  | 0.38      | 0.21            | 0.66      | 0.13                  | 0.54      | 0.21             | 0.58      |
| 2. Republican     | 0.23                 | 0.63      | 0.15            | 0.44      | 0.24                  | 0.67      | 0.27             | 0.72      |
| 3. PositiveAffect | 1.16                 | 1.28      | 1.19            | 1.28      | 2.48                  | 2.78      | 2.31             | 2.46      |
| 4. NegativeAffect | 0.35                 | 0.72      | 0.54            | 0.88      | 0.79                  | 1.66      | 0.98             | 1.61      |
| 5. MoralEmotional | 0.29                 | 0.6       | 0.42            | 0.72      | 0.65                  | 1.22      | 0.78             | 1.25      |

**Table S22. Meta-Analyzed Effect Sizes (Facebook Reactions)**

| name      | estimate | conf.low | conf.high | model    |
|-----------|----------|----------|-----------|----------|
| Shares    | 1.53     | 1.41     | 1.66      | Outgroup |
| Comments  | 1.77     | 1.51     | 2.08      | Outgroup |
| Likes     | 1.30     | 1.20     | 1.42      | Outgroup |
| Love      | 1.15     | 0.99     | 1.33      | Outgroup |
| Haha      | 1.96     | 1.40     | 2.75      | Outgroup |
| Wow       | 1.36     | 1.28     | 1.44      | Outgroup |
| Sad       | 1.29     | 1.19     | 1.40      | Outgroup |
| Angry     | 2.19     | 1.68     | 2.84      | Outgroup |
| Retweets  | 1.83     | 1.35     | 2.49      | Outgroup |
| Favorites | 1.49     | 1.22     | 1.81      | Outgroup |
| Shares    | 1.14     | 0.99     | 1.30      | Ingroup  |
| Comments  | 1.47     | 1.24     | 1.74      | Ingroup  |
| Likes     | 1.34     | 1.13     | 1.60      | Ingroup  |
| Love      | 1.57     | 1.24     | 2.00      | Ingroup  |
| Haha      | 1.42     | 1.20     | 1.68      | Ingroup  |
| Wow       | 0.98     | 0.92     | 1.04      | Ingroup  |
| Sad       | 0.94     | 0.86     | 1.03      | Ingroup  |
| Angry     | 1.18     | 0.99     | 1.42      | Ingroup  |
| Retweets  | 0.96     | 0.81     | 1.14      | Ingroup  |
| Favorites | 1.20     | 1.09     | 1.32      | Ingroup  |



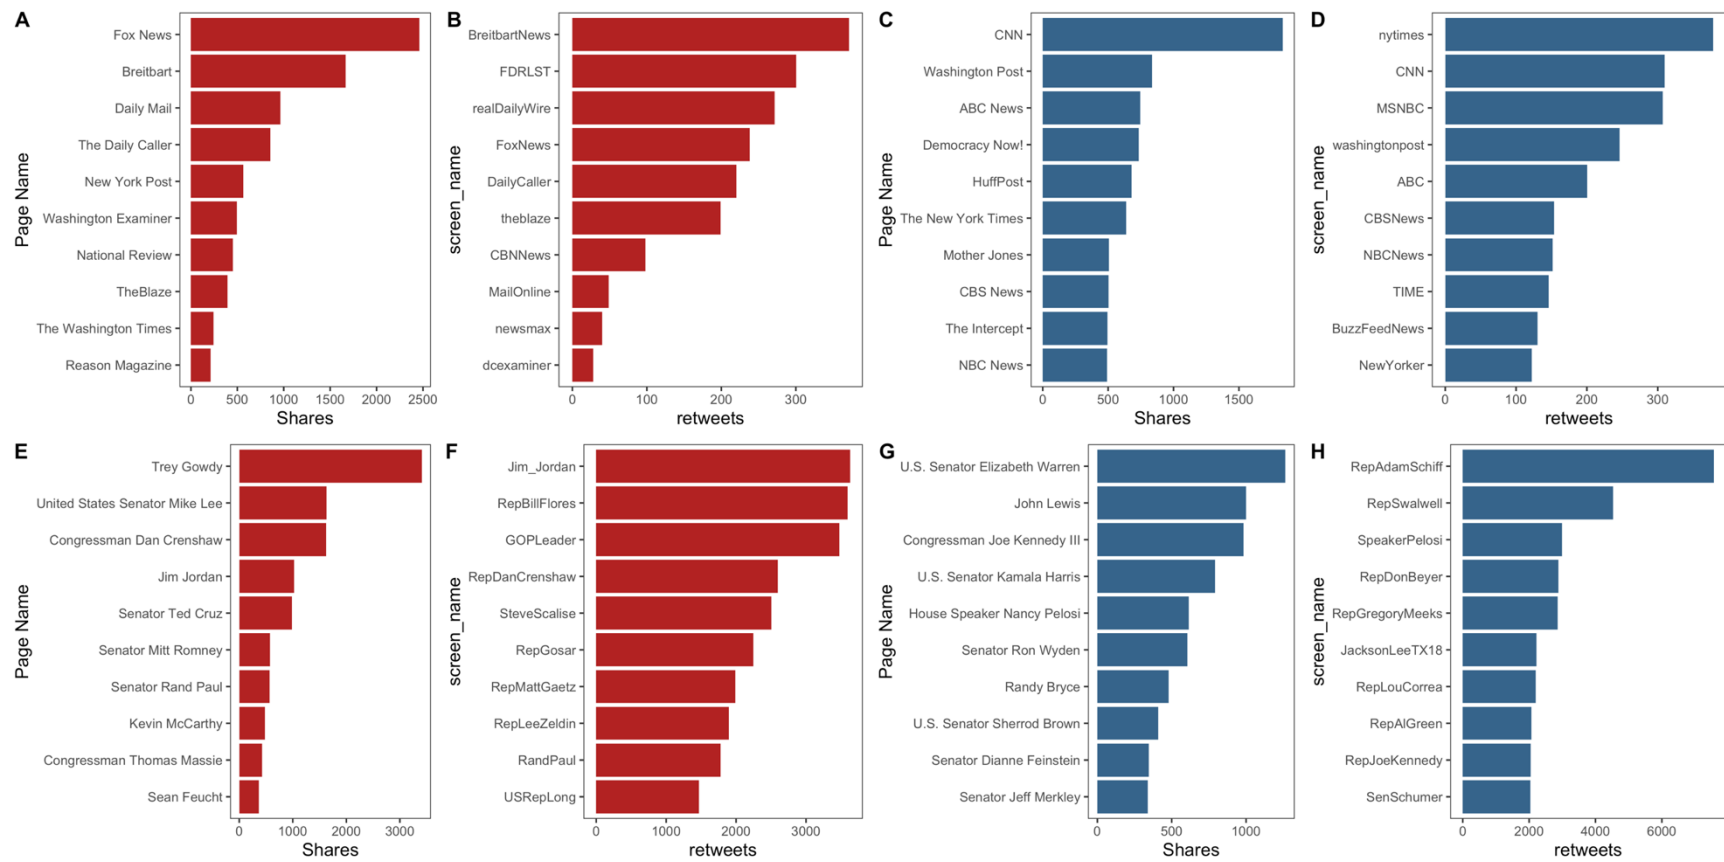

**Figure S1.** Pages Associated with the Most Engagement on Facebook and Twitter. Panels represent (A) conservative media Facebook, (B) conservative media Twitter, (C) liberal media Facebook, (D), liberal media Twitter, (E) conservative congress Facebook, (F) conservative congress Twitter, (G) liberal congress Facebook, and (H) liberal congress Twitter.

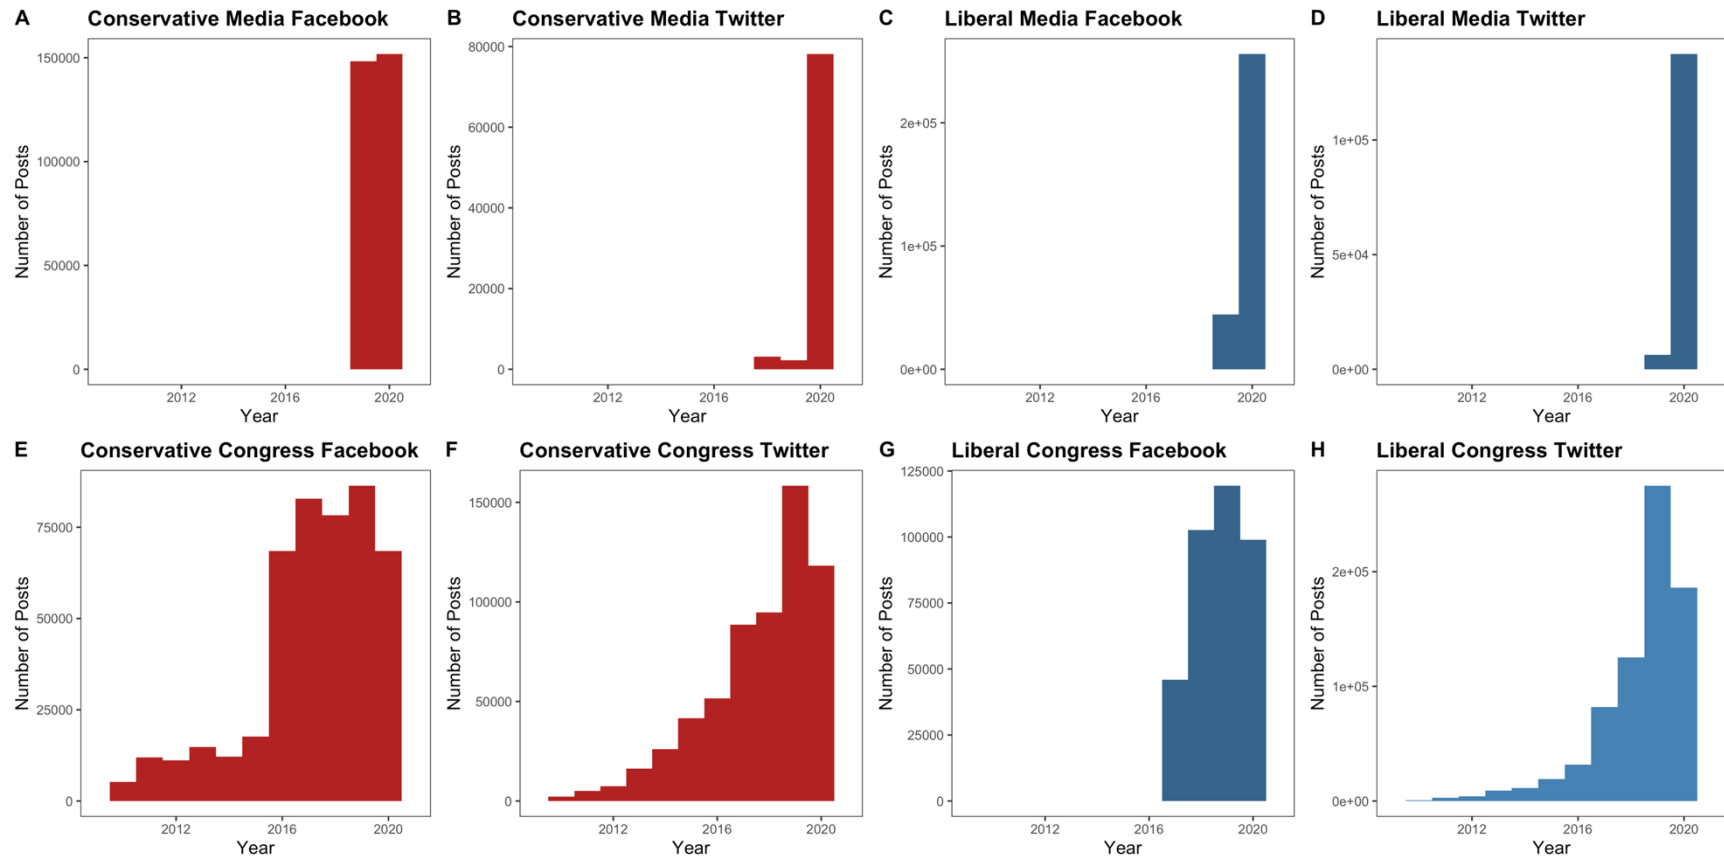

**Figure S2.** Histograms of the time the tweets and Facebook posts were created. The media tweets were retrieved on May 4 and July 11, 2020; the congress tweets were retrieved on July 2, 2020; the media Facebook posts were retrieved on August 14, 2020, and the congress media posts were retrieved on August 18, 2020.

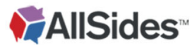

# Top Online News Media Bias Ratings

AllSides media bias ratings are based on multi-partisan, scientific analysis.  
All ratings are based on online content only — not TV, print, or radio content.  
Ratings do not reflect accuracy or credibility; they speak to perspective only.  
Visit AllSides.com to view over 600 media bias ratings.

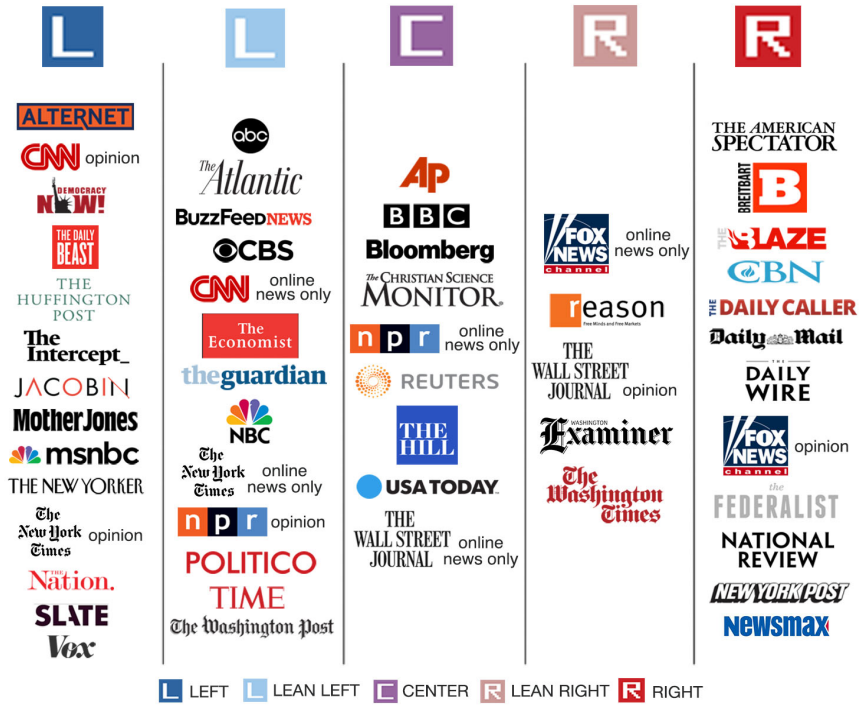

Version 1.1 | AllSides 2019

Figure S3: AllSides Media Bias Chart. The above 2019 AllSides Media Bias Chart (retrieved from AllSides.com) was used retrieve Twitter handles and Facebook accounts. The left and right media accounts (but not the centrist ones) were used.
